# Supplementary material for: The growth mechanism of apatite nanocrystals assisted by citrate: relevance to bone biomineralization
Source: Royal Society of Chemistry journal article supplement (doi:10.1039/c4ce01415d), 2014-11-19
Supplement: c4ce01415d1.pdf [file c4ce01415d1.pdf]

## Electronic Supplementary Information (ESI)

### Growth mechanism of apatite nanocrystals assisted by citrate: relevance to bone biomineralization

Michele Iafisco,<sup>\*,a</sup> Gloria Belén Ramírez-Rodríguez,<sup>a,b</sup> Yuriy Sakhno,<sup>c</sup> Anna Tampieri,<sup>a</sup> Gianmario Martra,<sup>c</sup> Jaime Gómez-Morales,<sup>b</sup> and José Manuel Delgado-López<sup>\*,b</sup>

<sup>a</sup>*Istituto di Scienza e Tecnologia dei Materiali Ceramici (ISTEC), Consiglio Nazionale delle Ricerche (CNR), Via Granarolo 64, 48018 Faenza. Italy. E-mail: michele.iafisco@istec.cnr.it;*

<sup>b</sup>*Laboratorio de Estudios Cristalográficos, Instituto Andaluz de Ciencias de la Tierra, IACT (CSIC-UGR), Av. Las Palmeras 4, 18100 Armilla, Spain. E-mail: jmdl@lec.csic.es*

<sup>c</sup>*Dipartimento di Chimica & Centro Interdipartimentale "Nanostructured Interfaces and Surfaces"- NIS, Università degli Studi di Torino, Via P. Giuria 7, 10125 Torino, Italy.*

#### Crystallization method

Calcium chloride dihydrate ( $\text{CaCl}_2 \cdot 2\text{H}_2\text{O}$ , BioXtra,  $\geq 99,0\%$  pure), sodium citrate tribasic dihydrate ( $\text{Na}_3(\text{Cit}) \cdot 2\text{H}_2\text{O}$  where Cit = citrate =  $\text{C}_6\text{H}_5\text{O}_7$ , ACS reagent,  $\geq 99,0\%$  pure), sodium phosphate dibasic ( $\text{Na}_2\text{HPO}_4$ , ACS reagent,  $\geq 99,0\%$  pure) and sodium carbonate monohydrate ( $\text{Na}_2\text{CO}_3 \cdot \text{H}_2\text{O}$ , ACS reagent, 99.5% pure) were supplied by Sigma-Aldrich. All the solutions were prepared with ultrapure water ( $0.22 \mu\text{S}$ ,  $25^\circ\text{C}$ , MilliQ, Millipore). The nanocrystals were obtained by a batch heating method described elsewhere.<sup>1</sup> Briefly, two solutions (1:1 v/v, 200 mL total) of (i) 0.1 M  $\text{CaCl}_2$  + 0.4 M  $\text{Na}_3(\text{Cit})$  and (ii) 0.12 M  $\text{Na}_2\text{HPO}_4$  were mixed at  $4^\circ\text{C}$ . The mixture (pH=8.5 adjusted with HCl) was then introduced in a 250 mL round-bottom flask, sealed with a glass stopper and immersed in a water bath at  $80^\circ\text{C}$ . The precipitates were then matured in the mother solution for 30 s, 5 min, 1h, 4 h and 96 h at  $80^\circ\text{C}$ . After the precipitation, the particles were repeatedly washed with ultrapure water (MilliQ, Millipore) by centrifugation, freeze-dried (LyoQuest, Telstar, Spain) and stored at  $4^\circ\text{C}$  for further characterizations. The same syntheses were also performed but in the absence of citrate (blank experiments).

#### Characterization techniques

A hot-line pH probe (Sentron, Netherlands) immersed in the flask provided *in situ* measurements of the pH continuously during the precipitation process at 80 °C. Transmission electron microscopy (TEM) and high resolution TEM (HR-TEM) observations were performed with a STEM Philips CM 20 microscope operated at 80 kV (used also for selected area electron diffraction, SAED, analysis) and with a Jeol 3010 UHR microscope, operated at 300 kV, respectively. As apatite samples might evolve under the electron beam, potentially leading to further crystallization and/or loss of bulk water,<sup>2-4</sup> observations were carried out under low illumination conditions (significantly lower than that indicated in the references) to avoid any modifications to the materials during the analysis. X-ray powder diffraction (XRPD) patterns were collected using a Cu K $\alpha$  radiation ( $\lambda = 1.5418 \text{ \AA}$ ) on a PANalytical X'Pert PRO diffractometer equipped with a PIXcel detector operating at 45 kV and 40 mA. For the diffracted beam an automatic-variable anti-scatter slit with an irradiated length of 10 mm was used. The  $2\theta$  range was from  $5^\circ 2\theta$  to  $80^\circ 2\theta$  with a step size of  $0.039^\circ 2\theta$ . Atomic force microscopy (AFM) images were collected with a Nanoscope IIIA microscope (Digital Instruments, Veeco, Santa Barbara, USA) in tapping mode by scanning the surface in air with silicon probes (NCHV, spring constant of  $42 \text{ N m}^{-1}$  and resonant frequency of 320 kHz, Veeco Probes, Santa Barbara, USA).

#### **Sample preparation for TEM, HR-TEM and AFM observations.**

The freeze-dried powdered samples were dispersed in ultrapure water. A drop of this slurry was deposited either on Cu grids (HR-TEM and TEM) or on the atomically flat surface of a freshly cleaved mica substrate (AFM). They were subsequently dried by evaporation overnight at room temperature in a vacuum desiccator before the corresponding analysis.

#### **Solution Chemistry Calculation**

The supersaturations of the solutions were calculated by Visual MINTEQ (Version 3.0).<sup>5</sup> The solubility product,  $K_{sp}$ , of the solid phases (HA: hydroxyapatite, OCP: Octacalcium phosphate, DCPD: Dicalcium phosphate, and ACP: Amorphous calcium phosphate) used in the calculation were extracted from the MINTEQ (type6) database (NIST 46.7).

## Supplementary Figures

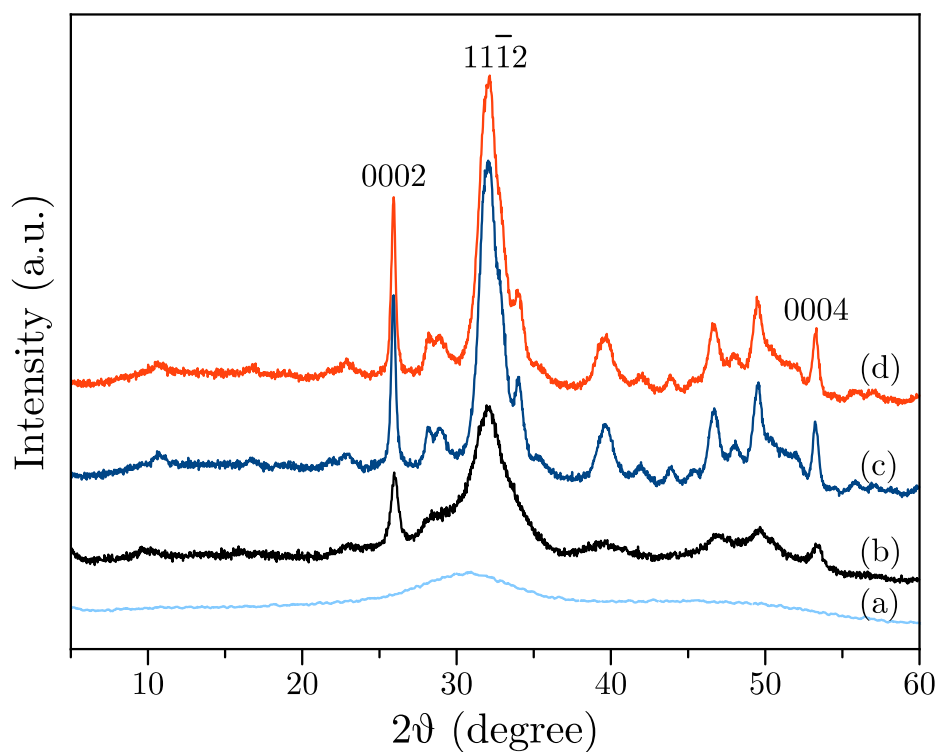

**Figure S1.** XRPD patterns of the calcium phosphates synthesized in presence of citrate at different maturation times: a) 30 s, b) 5 min, c) 4 h and d) 96 h.

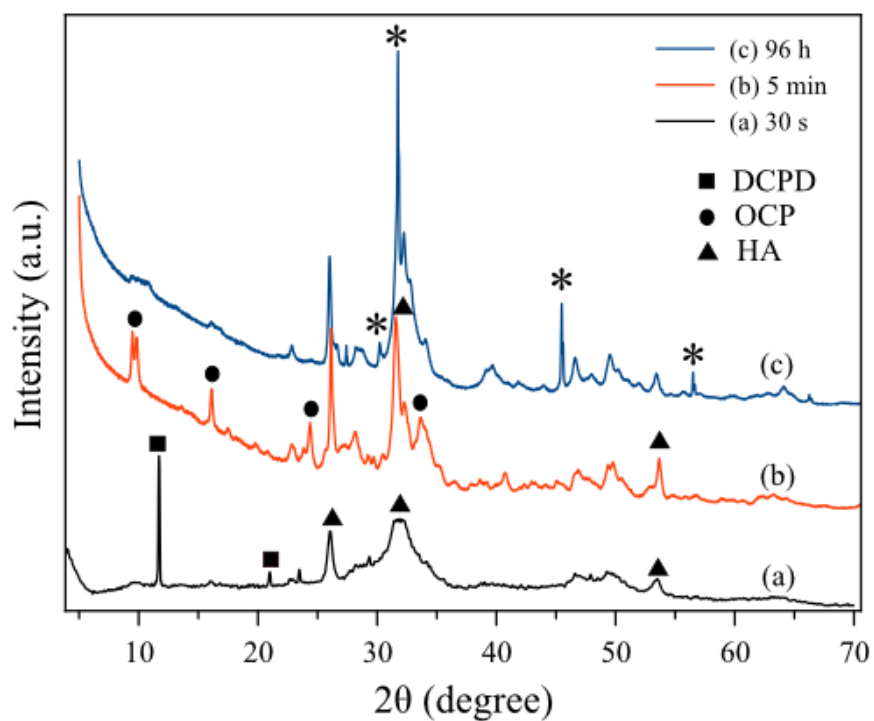

**Figure S2.** XRPD patterns of the calcium phosphates synthesized in the absence of citrate at different maturation times: (a) 30 s, (b) 5 min and (c) 96 hours. The asterisks indicate the presence of impurities of sodium chloride crystals.

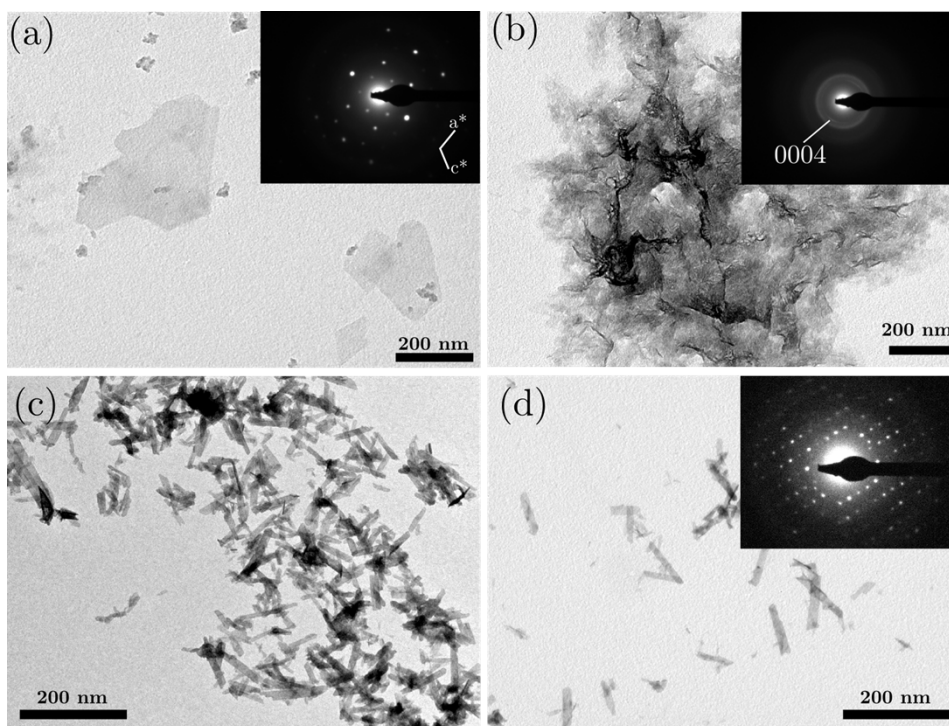

**Figure S3.** TEM micrographs of the calcium phosphates synthesized in the absence of citrate at different maturation times: (a,b) 30 s, (c) 5 min and (d) 96 hours.

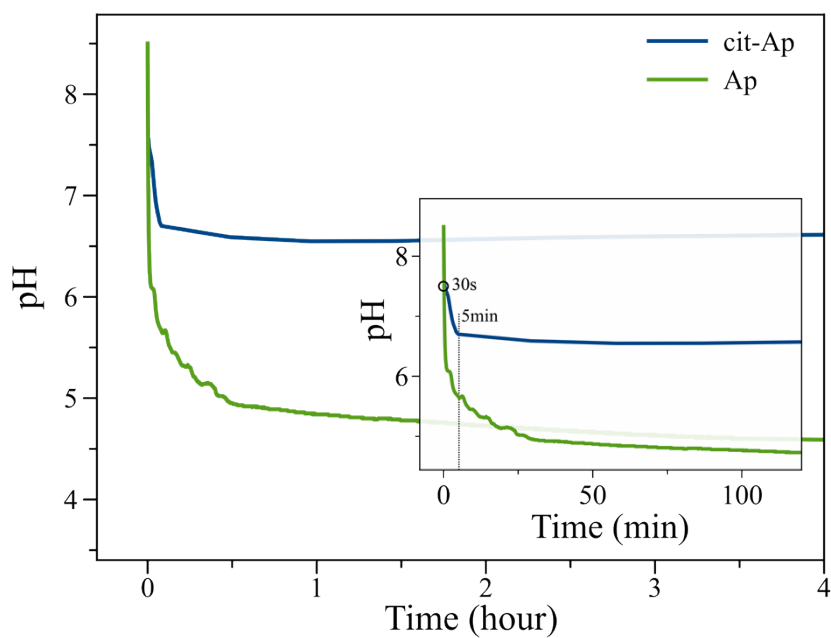

**Figure S4.** pH evolution during the crystallization experiments in the presence (blue curve) and in the absence (green curve) of citrate. The inset represents a enlarge view of the same curves.

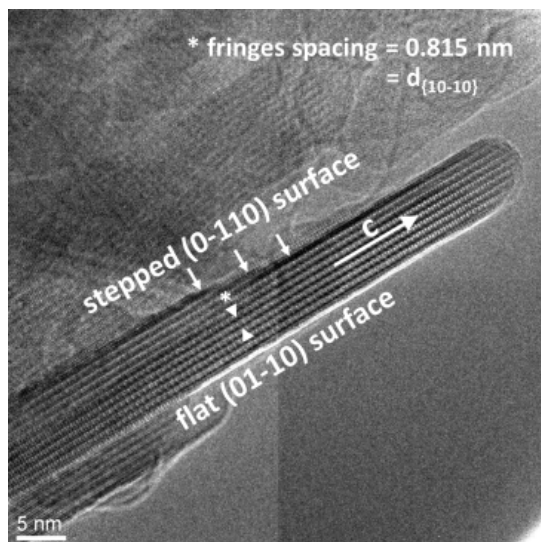

**Figure S5.** HR-TEM image of a cit-Ap-96h nanoparticles with the indexing of the lattice fringes. Original magnification: 400kx.

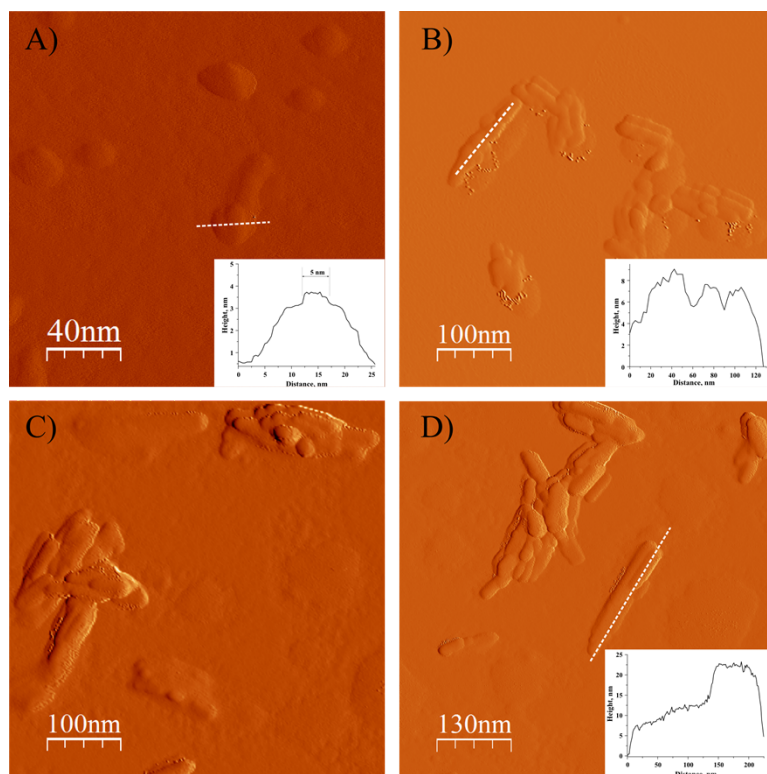

**Figure S6.** AFM images of calcium phosphate nanoparticles synthesized in presence of citrate at different maturation times: (a) 30 s, (b) 5 min, (c) 4 hours and (d) 96 hours. The insets show the vertical sections along the dotted lines of each figure.

**Table S1.** Ca concentration and Saturation Index (SI) calculated by Visual MINTEQ 3.0 [5]. [Ca]<sub>0</sub>: initial Ca concentration; [Ca]<sub>eq</sub>: Ca concentration in equilibrium with the solid phases; SI=log (IAP)-log K<sub>sp</sub>, being IAP the ionic activity product and K<sub>sp</sub> the solubility product. MINTEQ database (NIST 4.6.7) was used for these calculations [5].

|                         | Citrate concentration |        |
|-------------------------|-----------------------|--------|
|                         | 0 mM                  | 200 mM |
| [Ca] <sub>0</sub> /mM   | 50                    | 50     |
| [Ca] <sub>eq</sub> / mM | 14.4                  | 7.2    |
| SI (ACP)                | 8.4                   | 6.2    |
| SI (HA)                 | 22.1                  | 18.5   |
| SI (OCP)                | 14.1                  | 11.1   |
| SI (DCPD)               | 1.4                   | 0.6    |

**Table S2.** Structural water and citrate content of apatite nanoparticles synthesized in presence of citrate at different maturation times calculated by thermo-gravimetric analysis (TGA). Data extracted from reference [1]

| Maturation Time | Structural water (%wt.) | Citrate (%wt.) |
|-----------------|-------------------------|----------------|
| 4 hours         | 3.9 ± 0.1               | 2.3 ± 0.1      |
| 24 hours        | 3.3 ± 0.1               | 1.9 ± 0.1      |
| 96 hours        | 2.6 ± 0.2               | 2.0 ± 0.1      |

## References

- [1] Delgado-López, J.; Iafisco, M.; Rodríguez, I.; Tampieri, A.; Prat, M.; Gómez-Morales, J. *Acta Biomater.*, **2012**, *8*, 3491-3499.
- [2] Meldrum, A.; Wang, L.; Ewing, R. *Am. Mineral.*, **1997**, *82*, 858–869.
- [3] Wang, L.; Wang, S.; Ewing, R.; Meldrum, A.; Birtcher, R.; Provencio, P.; Weber W.; Matzke, H. *Mater. Sci. Eng., A* **2000**, *286*, 72–80.
- [4] Celotti, G.; Tampieri, A.; Sprio, S.; Landi, E.; Bertinetti, L.; Martra, G.; Ducati, C. *J. Mater. Sci.: Mater. Med.*, **2006**, *17*, 1079–1087.
- [5] Gustafsson, J.P. Visual MINTEQ, Version 3.0. 2010. Stockholm. Available from: <http://www.lwr.kth.se/English/OurSoftware/vminteq>
